# Supplementary material for: First Known Report of mcr-Harboring Enterobacteriaceae in the Dominican Republic
Source: MDPI journal article supplement (doi:10.3390/ijerph20065123), 2023-03-14
Supplement: s1 [file s1]

**Table S1.** Characteristics of *mcr*-positive isolates, including animal source and sample type.

| Isolate ID   | Animal source | Sample type | Location            | Genus and species | Sequence type | <i>mcr</i> WGS Result | NCBI Short Read Archive ID |
|--------------|---------------|-------------|---------------------|-------------------|---------------|-----------------------|----------------------------|
| DR2-002C4    | Swine         | Fecal       | Santo Domingo Norte | <i>E. coli</i>    | 1602          | <i>mcr</i> -1.1       | SRR17583609                |
| DR2-003C1    | Swine         | Fecal       | Santo Domingo Norte | <i>E. coli</i>    | 1602          | <i>mcr</i> -1.1       | SRR17583597                |
| DR2-004A1    | Swine         | Fecal       | Santo Domingo Norte | <i>E. coli</i>    | 29            | <i>mcr</i> -1.1       | SRR18036934                |
| DR2-004C1    | Swine         | Fecal       | Santo Domingo Norte | <i>E. coli</i>    | 1602          | <i>mcr</i> -1.1       | SRR17583588                |
| DR2-004C2    | Swine         | Fecal       | Santo Domingo Norte | <i>E. coli</i>    | 1602          | <i>mcr</i> -1.1       | SRR17583582                |
| DR2-005C1    | Swine         | Fecal       | Santo Domingo Norte | <i>E. coli</i>    | 1602          | <i>mcr</i> -1.1       | SRR17583576                |
| DR2-006A1    | Swine         | Fecal       | Santo Domingo Norte | <i>E. coli</i>    | 50            | <i>mcr</i> -1.1       | SRR17583608                |
| DR2-006A3    | Swine         | Fecal       | Santo Domingo Norte | <i>E. coli</i>    | 410           | <i>mcr</i> -1.1       | SRR17583591                |
| DR2-006C1    | Swine         | Fecal       | Santo Domingo Norte | <i>E. coli</i>    | 8233          | <i>mcr</i> -1.1       | SRR17583580                |
| DR2-006C2    | Swine         | Fecal       | Santo Domingo Norte | <i>E. coli</i>    | 8233          | <i>mcr</i> -1.1       | SRR17583596                |
| DR2-006C3    | Swine         | Fecal       | Santo Domingo Norte | <i>E. coli</i>    | 8233          | <i>mcr</i> -1.1       | SRR17583587                |
| DR2-006C4    | Swine         | Fecal       | Santo Domingo Norte | <i>E. coli</i>    | 8233          | <i>mcr</i> -1.1       | SRR17583581                |
| DR2-006C5    | Swine         | Fecal       | Santo Domingo Norte | <i>E. coli</i>    | 8233          | <i>mcr</i> -1.1       | SRR18036933                |
| DR2-006C6    | Swine         | Fecal       | Santo Domingo Norte | <i>E. coli</i>    | 8233          | <i>mcr</i> -1.1       | SRR17583575                |
| DR2-007A1    | Swine         | Fecal       | Santo Domingo Norte | <i>E. coli</i>    | 8233          | <i>mcr</i> -1.1       | SRR18036932                |
| DR2-007C1    | Swine         | Fecal       | Santo Domingo Norte | <i>E. coli</i>    | 1602          | <i>mcr</i> -1.1       | SRR17583574                |
| DR2-007C2    | Swine         | Fecal       | Santo Domingo Norte | <i>E. coli</i>    | 1602          | <i>mcr</i> -1.1       | SRR17583573                |
| DR2-010A1    | Swine         | Feed        | Santo Domingo Norte | <i>E. coli</i>    | 1771          | <i>mcr</i> -1.1       | SRR17583569                |
| DR2-010A2    | Swine         | Feed        | Santo Domingo Norte | <i>E. coli</i>    | 1771          | <i>mcr</i> -1.1       | SRR17583595                |
| DR2-101A2    | Poultry       | Fecal       | Moca                | <i>E. coli</i>    | 410           | <i>mcr</i> -1.1       | SRR17583604                |
| DR2-101A3    | Poultry       | Fecal       | Moca                | <i>E. coli</i>    | 410           | <i>mcr</i> -1.1       | SRR17583594                |
| DR2-198A2    | Swine         | Fecal       | Moca                | <i>E. coli</i>    | 191           | <i>mcr</i> -1.1       | SRR17583602                |
| DR2-272A1    | Beef Cattle   | Meat        | Santo Domingo       | <i>E. coli</i>    | 10            | <i>mcr</i> -1.1       | SRR17583601                |
| DR2-300A1    | Swine         | Fecal       | La Vega             | <i>E. coli</i>    | 6778          | <i>mcr</i> -1.1       | SRR17583600                |
| DR2-301C4    | Swine         | Fecal       | La Vega             | <i>E. coli</i>    | 48            | <i>mcr</i> -1.1       | SRR17583607                |
| DR2-302C1    | Swine         | Fecal       | La Vega             | <i>E. coli</i>    | 48            | <i>mcr</i> -1.1       | SRR17583606                |
| DR2-302C2    | Swine         | Fecal       | La Vega             | <i>E. coli</i>    | 48            | <i>mcr</i> -1.1       | SRR17583593                |
| DR2-302C3(1) | Swine         | Fecal       | La Vega             | <i>E. coli</i>    | 48            | <i>mcr</i> -1.1       | SRR17583586                |
| DR2-302C3(2) | Swine         | Fecal       | La Vega             | <i>E. coli</i>    | 48            | <i>mcr</i> -1.1       | SRR17583592                |
| DR2-302C4    | Swine         | Fecal       | La Vega             | <i>E. coli</i>    | 48            | <i>mcr</i> -1.1       | SRR17583579                |
| DR2-303A1    | Swine         | Fecal       | La Vega             | <i>E. coli</i>    | 191           | <i>mcr</i> -1.1       | SRR17583590                |
| DR2-303A2    | Swine         | Fecal       | La Vega             | <i>E. coli</i>    | -             | <i>mcr</i> -1.1       | SRR17583599                |
| DR2-304C1    | Swine         | Fecal       | La Vega             | <i>E. coli</i>    | 871           | <i>mcr</i> -1.1       | SRR17583598                |
| DR2-304C2    | Swine         | Fecal       | La Vega             | <i>E. coli</i>    | 871           | <i>mcr</i> -1.1       | SRR17583589                |
| DR2-304C3    | Swine         | Fecal       | La Vega             | <i>E. coli</i>    | 871           | <i>mcr</i> -1.1       | SRR17583585                |
| DR2-305A1    | Swine         | Fecal       | La Vega             | <i>E. coli</i>    | 48            | <i>mcr</i> -1.1       | SRR17583584                |
| DR2-305A2    | Swine         | Fecal       | La Vega             | <i>E. coli</i>    | 48            | <i>mcr</i> -1.1       | SRR17583578                |
| DR2-306A1    | Swine         | Fecal       | La Vega             | <i>E. coli</i>    | 191           | <i>mcr</i> -1.1       | SRR17583583                |
| DR2-306A2    | Swine         | Fecal       | La Vega             | <i>E. coli</i>    | 191           | <i>mcr</i> -1.1       | SRR17583577                |
